# Supplementary material
Source: PubMed Central journal article supplement (PMC3057387)
Supplement: NIHMS261167-supplement-3.pdf [file NIHMS261167-supplement-3.pdf]

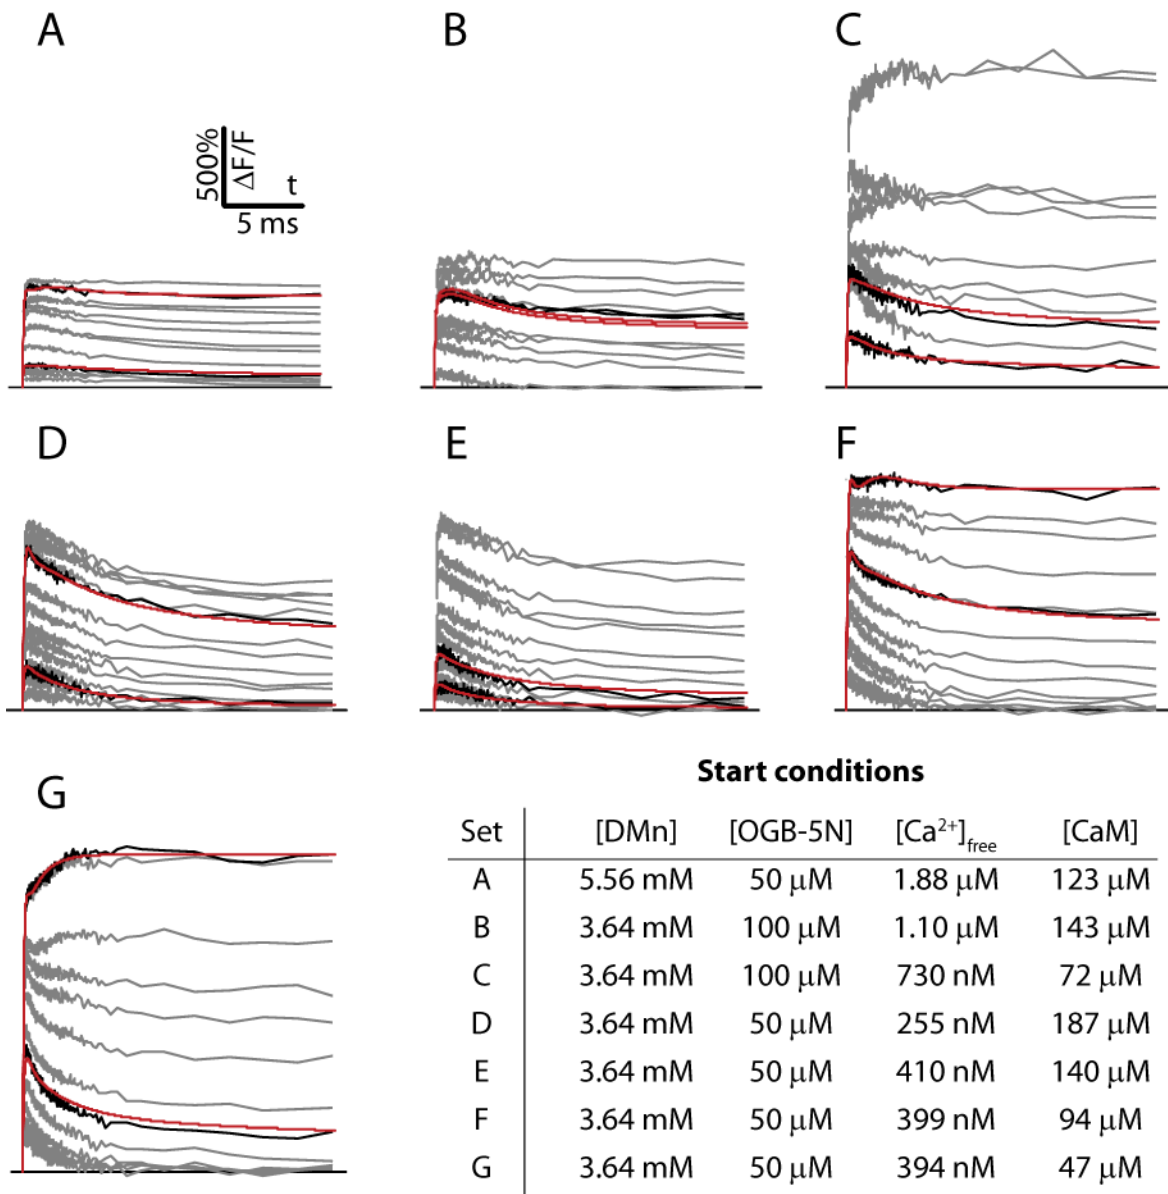

**Supplementary Figure 2. Examples of fitted data sets.** All individual Ca<sup>2+</sup> transients for the experiments with CaM were grouped according to the experimental conditions indicated in the Table (inset). The black traces are examples of one of the randomly picked datasets that were fitted simultaneously. The red lines are the actual fits for that set. Scale bars in A apply to all datasets.
