# Supplementary material
Source: PubMed Central journal article supplement (PMC3057387)
Supplement: NIHMS261167-supplement-5.pdf [file NIHMS261167-supplement-5.pdf]

**CB**

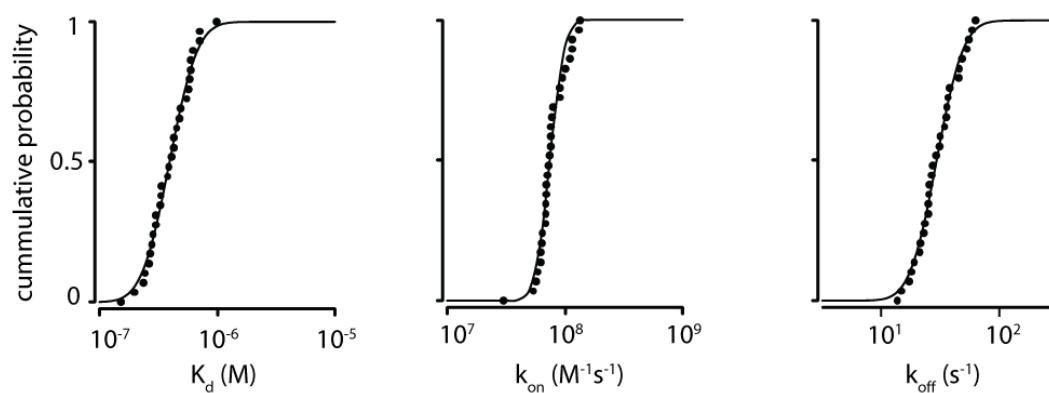

**Supplementary Figure 4.  $Ca^{2+}$  binding properties of CB.** Shown are the fitted results (fitted parameters) of all the randomly chosen sets of CB traces as cumulative probability plots. The solid lines are fits with a log-normal distribution function for which the results can be found in the main text.
