# Supplementary material
Source: PubMed Central journal article supplement (PMC3057387)
Supplement: NIHMS261167-supplement-7.pdf [file NIHMS261167-supplement-7.pdf]

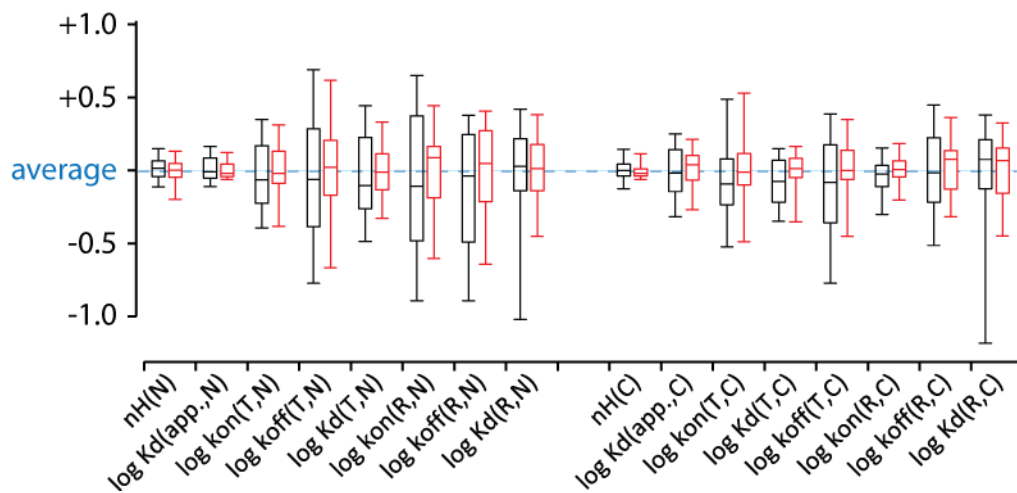

**Supplementary Figure 6. Box and whiskers plots of the fitted parameters lined up at their averages.** The spread of all the fits (black) (*i.e.*, the data from Supplementary Fig. 3) can be compared to the spread caused by random deviation of  $\pm 5\%$  in the constant parameters (see text for details) of fits to 2 sets of curves from the same dataset (red). The variations caused by deviations of parameters assumed to be constant are comparable or smaller than those caused by other factors inherent to the whole experiment (red boxes are smaller than the black ones).
