# Supplementary material
Source: PubMed Central journal article supplement (PMC3057387)
Supplement: NIHMS261167-supplement-10.pdf [file NIHMS261167-supplement-10.pdf]

### Supplementary data 3. Quantification of Ca<sup>2+</sup> buffering capacity ( $\kappa$ )

The buffering capacity  $\kappa$  is defined as<sup>22</sup> the increase in the Ca<sup>2+</sup> that is bound to buffers in a system relative to the amount of Ca<sup>2+</sup> that will stay unbound upon a change in total Ca<sup>2+</sup> of that system:

$$\kappa = \frac{d[CaB]}{d[Ca^{2+}]} \quad (\text{eq. S7})$$

Strictly this means that  $\kappa$  should quantify the full Ca<sup>2+</sup>-buffering capacity of a system, irrespective of the buffering speed. However, in practice it is used to describe only the fast buffering capacity of a system. Generally,  $\kappa$  is determined using the ‘added buffer’ approach<sup>22,23,24</sup>. With this method one determines the  $\Delta[Ca^{2+}]_{\text{total}}$  that is undetectable by the used dye due to the fast buffering of the system. It describes how much bigger the portion of  $\Delta Ca^{2+}$  that is rapidly bound by buffers in the system compared to the maximum portion that is detected by the dye. To compare  $\kappa$ ’s (determined by the added buffer method) between two experiments, one has to use dyes with similar kinetics because  $\kappa$  expresses the buffer capacity that is faster than the indicator. A faster indicator will yield a smaller  $\kappa$ . The decay in  $[Ca^{2+}]$  that is detected by the dye after the peak in measured  $[Ca^{2+}]$  is generally considered to result from slower mechanisms of  $[Ca^{2+}]$  regulation (*e.g.*, extrusion) and is therefore not included in  $\kappa$  (even if it is binding of Ca<sup>2+</sup> to a buffer).
