# Supplementary material
Source: PubMed Central journal article supplement (PMC3057387)
Supplement: NIHMS261167-supplement-11.pdf [file NIHMS261167-supplement-11.pdf]

#### Supplementary data 4. Neuronal CaM Concentration

Our simulation used a [CaM] of 100  $\mu\text{M}$ . If CaM is reduced in the simulation from 100  $\mu\text{M}$  to 50, 25 or 0  $\mu\text{M}$  the  $\kappa$  of the system with 30  $\mu\text{M}$  CB reduces from 19 to 10, 5 or 1, respectively. If instead CB is taken out of the simulation, the  $\kappa$  of the system with 100  $\mu\text{M}$  CaM reduces to 12. These results indicate that the fast buffering property of the whole system is directly dependent on CaM while the slower CB can only add to  $\kappa$  when a fast component is in place. This indicates that CaM is essential for the fast buffering in this system and not merely the dominant fast buffer because of its high concentration. The measured fast buffer capacity of spines is  $\sim 20^{4,5}$  which can be well accounted for by 100  $\mu\text{M}$  CaM. Thus, if 100  $\mu\text{M}$  CaM is an overestimate of the [CaM] in a spine, there must be an additional molecular species contributing to fast buffering. Thus far it has been challenging to directly measure the intracellular CaM concentration. However, many studies have measured the soluble fraction of CaM from brain homogenates relative to the total protein content (supplementary Table 1), which varies based on the specific brain region and species. Based on values from human, rat and bovine for CaM ( $\mu\text{g}/\text{mg}$  protein) and the total protein content ( $\sim 10\%$ <sup>6,7,8</sup>), we estimated the range of intracellular [CaM] (CaM ( $\mu\text{M}$ ), supplementary Table 1) assuming that the soluble fraction should be dissolved in the water content of the brain ( $\sim 77\%$ ). This value could be further refined by the assumption that all soluble CaM came from intracellular content ( $\sim 80\%$ ). This volume corrected [CaM] (vol. corrected CaM ( $\mu\text{M}$ ), supplementary Table 1) varied between 31 and 337  $\mu\text{M}$ . The large variation is mainly caused by the outliers for the reported CaM content in brain homogenates. We also calculated the [CaM] based on the median reported CaM content per brain region (green numbers, supplementary Table 1) and found the [CaM] varied from  $\sim 65$   $\mu\text{M}$  for the cerebellum to 152  $\mu\text{M}$  for the caudate nucleus. Therefore, in our simulation of a spine in the hippocampus, a [CaM] of 100  $\mu\text{M}$  might actually be an underestimate, especially when one considers that CaM could be enriched in specific cellular compartments<sup>9,10</sup>. Although these considerations are important in determining the role of CaM as the fast buffer, the absolute [CaM] is not essential to our discussion considering the activation of CaM or its individual lobes in a nano-domain. There we discussed the probability of a single CaM molecule being activated independent of the overall [CaM].

**Supplementary Table 1. Calculation of neuronal CaM concentration**

|                              | Water<br>(w/w %)                                                | Protein<br>(w/w %)                                       | soluble<br>CaM<br>( $\mu\text{g}/\text{mg}$<br>protein)                                                                                                       | soluble<br>CaM <sup>a</sup><br>(w/w %) | CaM <sup>b</sup><br>( $\mu\text{M}$ ) | extracell.<br>vol. <sup>11</sup><br>(%) | CaM<br>vol. corrected <sup>c</sup><br>( $\mu\text{M}$ ) |
|------------------------------|-----------------------------------------------------------------|----------------------------------------------------------|---------------------------------------------------------------------------------------------------------------------------------------------------------------|----------------------------------------|---------------------------------------|-----------------------------------------|---------------------------------------------------------|
| Whole Brain                  | 77–78 <sup>6</sup><br>77.8 <sup>12</sup><br>76–78 <sup>13</sup> | 8 <sup>6</sup><br>8–13 <sup>7</sup><br>9–10 <sup>8</sup> |                                                                                                                                                               |                                        |                                       |                                         |                                                         |
| Cerebrum/<br>Cerebral cortex |                                                                 |                                                          | 15.9 <sup>14</sup><br>16.9–17.8 <sup>15</sup><br>14–15 <sup>16</sup><br>13 <sup>17</sup><br>14 <sup>18</sup><br>13.7–13.8 <sup>19</sup><br>20.9 <sup>20</sup> | 0.104–0.272                            | 80–214<br>112 <sup>e</sup>            | 18–20                                   | 97–268<br>141 <sup>f</sup>                              |
| Cerebellum                   |                                                                 |                                                          | 11.2 <sup>15</sup><br>4 <sup>16</sup><br>9.5 <sup>21</sup><br>6 <sup>18</sup><br>7.5–7.7 <sup>19</sup><br>18.1 <sup>20</sup>                                  | 0.032–0.235                            | 25–185<br>52 <sup>e</sup>             | 21–31                                   | 31–268<br>65 <sup>f</sup>                               |
| Hippocampus                  |                                                                 |                                                          | 14.3 <sup>14</sup><br>15.2 <sup>15</sup><br>12 <sup>16</sup>                                                                                                  | 0.096–0.198                            | 74–156<br>111 <sup>e</sup>            | 22                                      | 94–200<br>139 <sup>f</sup>                              |
| Caudate nucl.                |                                                                 |                                                          | 15.2 <sup>14</sup><br>16.2 <sup>15</sup>                                                                                                                      | 0.122–0.211                            | 94–166<br>122 <sup>e</sup>            | 21                                      | 119–210<br>152 <sup>f</sup>                             |
| Striatum                     |                                                                 |                                                          | 15 <sup>16</sup><br>8 <sup>17</sup><br>26.4 <sup>20</sup>                                                                                                     | 0.064–0.343                            | 49–270<br>117 <sup>e</sup>            |                                         | 61–337 <sup>d</sup><br>146 <sup>f</sup>                 |
| Amygdala                     |                                                                 |                                                          | 13 <sup>16</sup>                                                                                                                                              | 0.104–0.169                            | 80–133<br>101 <sup>e</sup>            |                                         | 100–166 <sup>d</sup><br>126 <sup>f</sup>                |

<sup>a</sup>) soluble CaM (w/w %) =  $\frac{\text{soluble CaM } (\mu\text{g}/\text{mg protein})/10}{100} \times \text{Protein (w/w \%)} \text{ (eq. S4)}$

<sup>b</sup>) CaM ( $\mu\text{M}$ ) =  $\frac{\text{soluble CaM } (\mu\text{g}/\text{mg protein}) \times 10}{16.7\text{kDa} \times (\text{water (w/w \%)} / 100)} \text{ (eq. S5)}$

<sup>c</sup>) vol. corrected CaM ( $\mu\text{M}$ ) =  $\frac{\text{CaM } (\mu\text{M})}{1 - (\text{extracell. vol. (w/w \%)} / 100)}$  (eq. S6). An overall brain density of 1 g/ml was assumed, based on published volume and weight data<sup>6</sup>.

<sup>d</sup>) For these calculations 20% extracellular was used, estimated from the values of the other regions.

<sup>e</sup>) Value calculated using 77% water (w/w %), 10% protein (w/w %) and the median value for CaM ( $\mu\text{g}/\text{mg}$  protein).

<sup>f</sup>) Values calculated using values from e) and a extracellular volume of 20%.
