# Supplementary material
Source: PubMed Central journal article supplement (PMC3057387)
Supplement: NIHMS261167-supplement-12.pdf [file NIHMS261167-supplement-12.pdf]

### Supplementary data 5. Simulating 1 yM dye to measure $[Ca^{2+}]$

In a simulation the  $[Ca^{2+}]$  can be directly determined and does not have to be measured as such. However, to make a comparison with what would be measured in real measurements in cells, we calculated the  $Ca^{2+}$  signal that would be measured by adding to our simulation 1 yM ( $10^{-24}$  M) of OGB-1 (Fig. 2a,  $K_d=170$  nM,  $k_{on}=10^9$  M<sup>-1</sup>s<sup>-1</sup>), a dye often used for  $Ca^{2+}$  measurements in neurons. Such small concentration of OGB-1 is impossible to use in a real experiment. However, in a simulation it will not influence the actual  $[Ca^{2+}]$  but can still be used to reflect the limit of  $[Ca^{2+}]$  that would be imposed by the kinetic properties of OGB-1 in a real experiment ( $[Ca^{2+}]_{OGB-1}$ )<sup>5,25</sup>. In our simulation, the  $[Ca^{2+}]_{OGB-1}$  has a peak amplitude of 2.5  $\mu$ M. The limit of  $[Ca^{2+}]$  that could be measured with a dye in a real experiment is basically what is determined with the ‘added buffer’ approach used to determine  $\kappa$ <sup>22,23,24</sup>. By measuring the  $[Ca^{2+}]$  under different  $Ca^{2+}$  indicator concentrations one interpolates the  $[Ca^{2+}]$  that would be measured with no indicator present at all. Here we simply do the same by using an infinitesimally small amount of dye in the simulation. With a known  $\Delta[Ca^{2+}]_{total}$  of 50  $\mu$ M this means that fast buffer capacity ( $\kappa$ ) of the whole system (including fast buffering by CB and the C-terminus) is 19, which is comparable to values found for fast buffering in spines of CA1 pyramidal cells<sup>5,25</sup>.
