# Supplementary material
Source: PubMed Central journal article supplement (PMC3057387)
Supplement: NIHMS261167-supplement-13.pdf [file NIHMS261167-supplement-13.pdf]

## Supplementary data 6. Fast buffering by ATP

It has been suggested that ATP can contribute significantly to the fast buffering capacity of a cell<sup>28</sup>. To investigate this possibility, we repeated the 50  $\mu\text{M}$   $\text{Ca}^{2+}$  influx in the model (with CaM and CB) with ATP added to the system. For the properties of ATP we used  $K_{d\text{Ca}^{2+}}=200 \mu\text{M}$ ,  $K_{d\text{Mg}^{2+}}=100 \mu\text{M}$  and  $k_{\text{onCa}^{2+}}=2 \times 10^8 \text{M}^{-1}\text{s}^{-1}$ <sup>28</sup>. The binding and unbinding rates of  $\text{Mg}^{2+}$  to ATP were considered too slow to play a significant role in the studied timespan<sup>28</sup>. With 4 mM  $\text{MgATP}$ <sup>4,28</sup>, and 100 nM free  $\text{Ca}^{2+}$ , 580  $\mu\text{M}$  ATP will be free and available to buffer a rise in  $\text{Ca}^{2+}$ . Under these conditions, the  $\text{Ca}^{2+}$  signal observed with OGB-1 is only slightly smaller compared to the situation without ATP (Supplementary Fig. 7a, solid blue vs. red line). The  $\kappa$  determined from the system with 580  $\mu\text{M}$  free ATP only increases from 19 to 22 (Supplementary Fig. 7b). In comparison, when the simulation was repeated with no CaM and only ATP as a fast buffer, the observed  $[\text{Ca}^{2+}]_{\text{peak}}$  was  $>8 \mu\text{M}$  (Supplementary Fig. 7a solid green line) indicating this system had a buffering capacity of  $\kappa=4$  (Supplementary Fig. 7b), which is substantially smaller compared to values found for fast buffering in spines of CA1 pyramidal cells measured with OGB-1 ( $\kappa \sim 20$ )<sup>5,25</sup>. Clearly ATP under these conditions (4 mM  $[\text{MgATP}]_{\text{total}}$ ) will only minimally contribute to the buffering capacity. We attempted to actually measure the kinetic properties of  $\text{Ca}^{2+}$  binding to ATP and found it to be technically extremely difficult because CaATP and MgATP can form complexes with zwitterions such as pH buffers like HEPES<sup>29</sup> that are generally used in biological research:

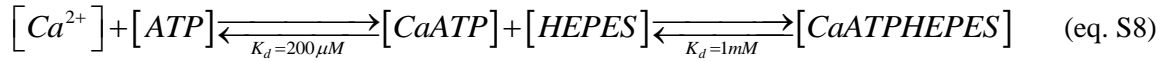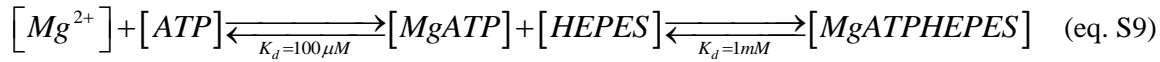

It is important for our measurements that the pH is strongly buffered since the kinetic properties on CBPs strongly depend on pH, and pH changes upon uncaging of DMn. Normally, we use a high concentration of HEPES which would further complicate dynamic measurements of  $\text{Ca}^{2+}$  binding to ATP making it impossible to measure it in this way. To ensure a stable acidity, HEPES is very often used in experiments as a pH buffer<sup>4,5,30</sup>. In the experiments<sup>30</sup> from which it was suggested that ATP can significantly contribute to the fast  $\text{Ca}^{2+}$  buffering capacity of a cell 10 mM HEPES was used. Unfortunately, this amount of HEPES was not accounted for when estimating the free  $[\text{ATP}]$ <sup>28</sup>. Using an estimated a  $K_d$  of 1 mM for HEPES to either CaATP and MgATP<sup>29</sup>, we calculated that 220  $\mu\text{M}$  ATP is free to buffer the  $\text{Ca}^{2+}$  rise in the presence of 10 mM HEPES total, 4 mM  $\text{MgATP}$  total and 100 nM free  $\text{Ca}^{2+}$ . This means that with 4 mM  $\text{MgATP}$  and 10 mM HEPES added<sup>4,5,30</sup> for the system modeled here (with 100  $\mu\text{M}$  CaM and 30  $\mu\text{M}$  CB) the  $\text{Ca}^{2+}$  signal measured with OGB-1 to a  $\Delta[\text{Ca}^{2+}]_{\text{total}}$  of 50  $\mu\text{M}$  would be almost identical to a system without the ATP (Supplementary Fig. 7a, long dash blue). The  $\kappa$  only increases from 19 to 20 in the system without ATP (Supplementary Fig. 7b, large dot blue). Moreover, in unperturbed cells the  $[\text{ATP}]_{\text{total}}$  is around 0.9 mM<sup>31</sup> and the  $[\text{Mg}^{2+}]_{\text{free}}$  around 1 mM<sup>32,33</sup> which would leave only 58  $\mu\text{M}$  ATP to buffer incoming  $\text{Ca}^{2+}$ , leading to a negligible increase in buffering capacity (Supplementary Fig. 7a and b, short dash/small dot blue). By itself ATP has some buffering capacity (Supplementary Fig. 7b, green).

Therefore, it will account for some of the fast buffering of CaM (Supplementary Fig. 7c) and will slightly increase the capacity of a whole system with CaM and CB present. However, the contribution is minimal under most experimental conditions (with HEPES) and negligible in unperturbed cells.

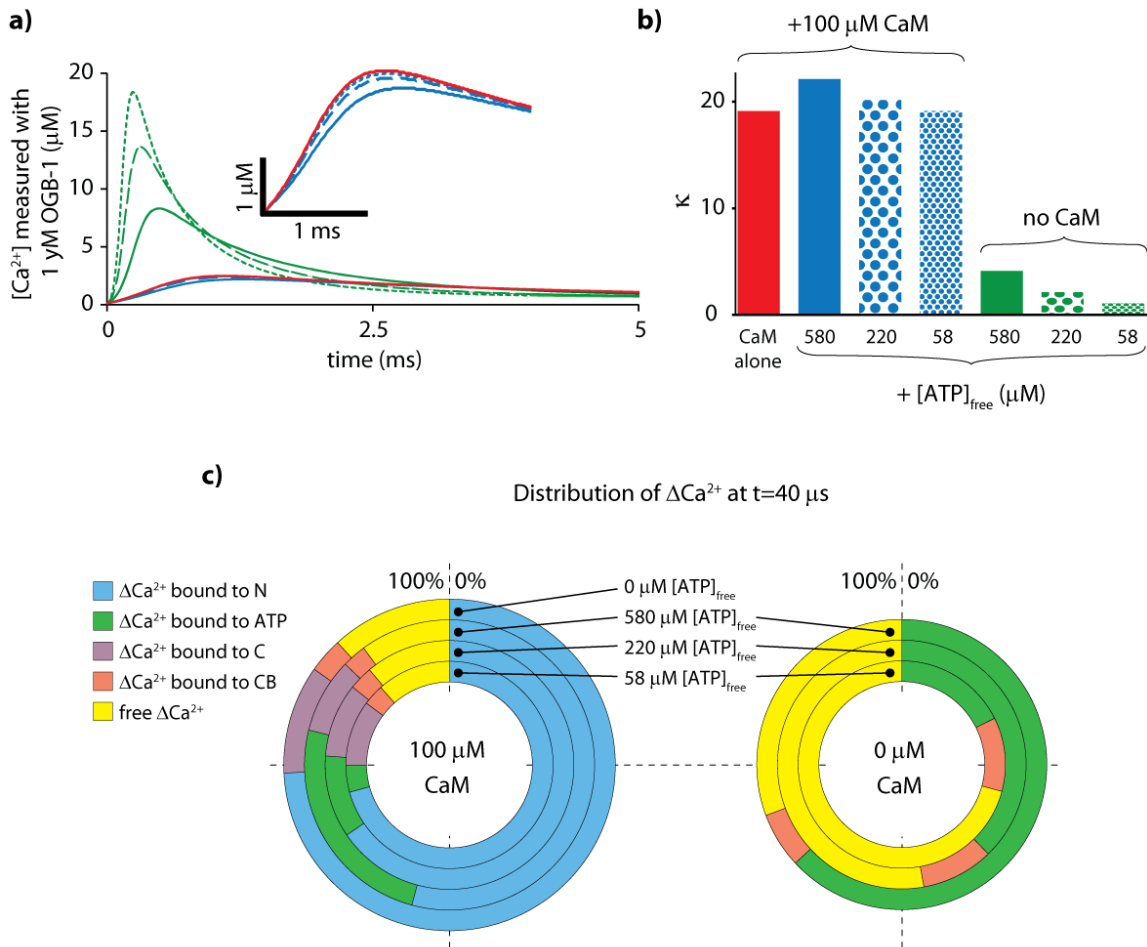

**Supplementary Figure 7. ATP as a fast  $Ca^{2+}$  buffer.** Single-compartment simulations of  $Ca^{2+}$  dynamics in a dendritic spine of a hippocampal CA1 pyramidal cell containing 100  $\mu M$  CaM, 30  $\mu M$  CB and varying amounts of free ATP. At  $t=0$ ,  $[Ca^{2+}]_{total}$  was rapidly ( $\tau=10 \mu s$ ) increased by 50  $\mu M$ . a)  $[Ca^{2+}]_{free}$  as it would be measured with 1 yM OGB-1 ( $[Ca^{2+}]_{OGB-1}$  with no ATP (red), 580  $\mu M$  (solid blue), 220  $\mu M$  (long dash blue) and 58  $\mu M$  (short dash blue) free ATP present. These are the expected values of free ATP under the recording conditions of 4 mM  $[MgATP]_{total}$  and 4 mM  $[MgATP]_{total}$  with 10 mM  $[HEPES]_{total}$  and the physiological condition of 0.9 mM  $[ATP]_{total}$  with 1 mM  $[Mg^{2+}]_{free}$  (respectively). For comparison, simulations are also shown of the  $[Ca^{2+}]_{OGB-1}$  when no CaM is present (green lines). b) From the  $[Ca^{2+}]_{OGB-1}$  curves the buffer capacity ( $\kappa$ ) only slightly increases due to the addition of ATP to the system (compare red to blue bars) as the buffering capacity of the ATP by itself is minimal (green bars). ATP does take over some of the fast buffering by CaM as shown in the distribution of the added  $Ca^{2+}$  after 40  $\mu s$  (c left figure). However, when CaM was taken out of the system there is a substantial increase in unbuffered  $Ca^{2+}$  at  $t=40 \mu s$  (c right figure).
